# Supplementary material for: Protocol for a systematic review of the financial burden experienced by people affected by head and neck cancer
Source: HighWire-hosted journal article supplement (doi:10.1136/bmjopen-2021-055213), 2022-02-01
Supplement: bmjopen-2021-055213supp001_data_supplement.pdf [file bmjopen-2021-055213supp001_data_supplement.pdf]

**Protocol for a systematic review of the financial burden experienced by people affected  
by head and neck cancer**

**Database Search Strategies**

- 1. CINAHL (VIA EBSCO)**
- 2. COCHRANE LIBRARY (VIA WILEY)**
- 3. ECONLIT (VIA EBSCO)**
- 4. EMBASE (VIA ELSEVIER)**
- 5. MEDLINE COMPLETE (VIA EBSCO)**

**CINAHL via EBSCO****Concept 1**

- S1 TI patient\* OR AB patient\*
- S2 TI family OR AB family
- S3 TI families OR families
- S4 TI carer\* OR AB carer\*
- S5 TI caregiver\* OR AB caregiver\*
- S6 TI survivor\* OR AB survivor\*
- S7 (MH "patients") OR (MH "family") OR (MH "cancer survivors") OR (MH "caregivers")

**Concept 2**

- S8 TI ((head OR neck OR mouth OR pharynx OR "oral cavity" OR "oral cavities" OR "accessory sinuses" OR "accessory sinus" OR "nasal cavity" OR "nasal cavities" OR "middle ear" OR larynx) N4 (cancer\* OR tumo#r OR neoplasm\*)) OR AB ((head OR neck OR mouth OR pharynx OR "oral cavity" OR "oral cavities" OR "accessory sinuses" OR "accessory sinus" OR "nasal cavity" OR "nasal cavities" OR "middle ear" OR larynx) N4 (cancer\* OR tumo#r OR neoplasm\*))
- S9 (MH "head and neck neoplasms") OR (MH "head") OR (MH "neck") OR (MH "mouth") OR (MH "pharynx") OR (MH "nose") OR (MH "nasal cavity") OR (MH "ear") OR (MH "larynx")

**Concept 3**

- S10 TI "financial toxicity" OR AB "financial toxicity"
- S11 TI "financial toxicities" OR AB "financial toxicities"
- S12 TI "financial worry" OR AB "financial worry"
- S13 TI "financial worries" OR AB "financial worries"

- S14 TI "financial burden" OR AB "financial burden"
- S15 TI "financial burdens" OR AB "financial burdens"
- S16 TI "financial hardship\*" OR AB "financial hardship\*"
- S17 TI "financial distress\*" OR AB "financial distress\*"
- S18 TI "material hardship\*" OR AB "material hardship\*"
- S19 TI "out of pocket" OR AB "out of pocket"
- S20 TI bankrupt\* OR AB bankrupt\*
- S21 TI "economic burden\*" OR AB "economic burden\*"
- S22 TI "economic hardship\*" OR AB "economic hardship\*"
- S23 TI debt\* OR AB debt\*
- S24 TI cost\* OR AB cost\*
- S25 (MH "economics") OR (MH "costs and cost analysis") OR (MH "bankruptcy") OR (MH "Debt, financial")
- S26 S1 OR S2 OR S3 OR S4 OR S5 OR S6 OR S7
- S27 S8 OR S9
- S28 S10 OR S11 OR S12 OR S13 OR S14 OR S15 OR S16 OR S17 OR S18 OR S19 OR S20 OR S21 OR S22 OR S23 OR S24 OR S25
- S29 S26 AND S27 AND S28
- S30 Limit to English and 01/01/2010 – 19/03/21

**Cochrane Library via Wiley****Concept 1**

- #1 MeSH descriptor: [Patients] this term only
- #2 (patient\*):ti,ab,kw with Cochrane Library publication date Between Jan 2010 and Mar 2021
- #3 (family):ti,ab,kw with Cochrane Library publication date Between Jan 2010 and Mar 2021
- #4 (families):ti,ab,kw with Cochrane Library publication date Between Jan 2010 and Mar 2021
- #5 MeSH descriptor: [Family] this term only
- #6 (carer\*):ti,ab,kw with Cochrane Library publication date Between Jan 2010 and Mar 2021
- #7 MeSH descriptor: [Caregivers] this term only
- #8 (caregiver\*):ti,ab,kw with Cochrane Library publication date Between Jan 2010 and Mar 2021
- #9 (survivor\*):ti,ab,kw with Cochrane Library publication date Between Jan 2010 and Mar 2021
- #10 MeSH descriptor: [Cancer Survivors] this term only

**Concept 2**

- #11 ((( (head OR neck OR mouth OR pharynx OR "oral cavity" OR "oral cavities" OR "accessory sinuses" OR "accessory sinus" OR "nasal cavity" OR "nasal cavities" OR "middle ear" OR larynx) Near/4 (cancer\* OR tumo?r\* OR neoplasm\*) ))) :ti,ab,kw with Cochrane Library publication date Between Jan 2010 and Mar 2021
- #12 MeSH descriptor: [Head] this term only

- #13 MeSH descriptor: [Neck] this term only
- #14 MeSH descriptor: [Mouth] this term only
- #15 MeSH descriptor: [Pharynx] this term only
- #16 MeSH descriptor: [Nose] this term only
- #17 MeSH descriptor: [Nasal Cavity] this term only
- #18 MeSH descriptor: [Ear] this term only
- #19 MeSH descriptor: [Larynx] this term only
- #20 MeSH descriptor: [Head and Neck Neoplasms] this term only
- #21 MeSH descriptor: [Squamous Cell Carcinoma of Head and Neck] this term only

### **Concept 3**

- #22 ("financial toxicity"):ti,ab,kw with Cochrane Library publication date Between Jan 2010 and Mar 2021
- #23 ("financial toxicities"):ti,ab,kw with Cochrane Library publication date Between Jan 2010 and Mar 2021
- #24 ("financial worries"):ti,ab,kw with Cochrane Library publication date Between Jan 2010 and Mar 2021
- #25 ("financial worry"):ti,ab,kw with Cochrane Library publication date Between Jan 2010 and Mar 2021
- #26 ("financial burden"):ti,ab,kw with Cochrane Library publication date Between Jan 2010 and Mar 2021
- #27 ("financial burden\*"):ti,ab,kw
- #28 ("financial hardship"):ti,ab,kw with Cochrane Library publication date Between Jan 2010 and Mar 2021

- #29 ("financial hardship\*"):ti,ab,kw with Cochrane Library publication date Between Jan 2010 and Mar 2021
- #30 ("financial stress"):ti,ab,kw with Cochrane Library publication date Between Jan 2010 and Mar 2021
- #31 ("financial distress"):ti,ab,kw with Cochrane Library publication date Between Jan 2010 and Mar 2021
- #32 ("material hardship"):ti,ab,kw with Cochrane Library publication date Between Jan 2010 and Mar 2021
- #33 ("material hardship\*"):ti,ab,kw with Cochrane Library publication date Between Jan 2010 and Jan 2021
- #34 ("out of pocket"):ti,ab,kw with Cochrane Library publication date Between Jan 2010 and Mar 2021
- #35 (bankrupt\*):ti,ab,kw with Cochrane Library publication date Between Jan 2010 and Mar 2021
- #36 ("economic burden"):ti,ab,kw with Cochrane Library publication date Between Jan 2010 and Mar 2021
- #37 ("economic burden\*"):ti,ab,kw with Cochrane Library publication date Between Jan 2010 and Jan 2021
- #38 ("economic hardship"):ti,ab,kw with Cochrane Library publication date Between Jan 2010 and Mar 2021
- #39 ("economic hardship\*"):ti,ab,kw with Cochrane Library publication date Between Jan 2010 and Jan 2021
- #40 (debt OR debtor OR debts):ti,ab,kw with Cochrane Library publication date Between Jan 2010 and Mar 2021

- #41 (cost\*):ti,ab,kw with Cochrane Library publication date Between Jan 2010 and Mar 2021
- #42 MeSH descriptor: [Costs and Cost Analysis] this term only
- #43 MeSH descriptor: [Economics] this term only
- #44 ("costs and cost analysis"):ti,ab,kw with Cochrane Library publication date Between Jan 2010 and Mar 2021
- #45 #1 OR #2 OR #3 OR #4 OR #5 OR #6 OR #7 OR #8 OR #9 OR #10
- #46 #11 OR #12 OR #13 OR #14 OR #15 OR #16 OR #17 OR #18 OR #19 OR #20 OR #21
- #47 #22 OR #23 OR #24 OR #25 OR #26 OR #27 OR #28 OR #29 OR #30 OR #31 OR #32 OR #33 OR #34 OR #35 OR #36 OR #37 OR #38 OR #39 OR #40 OR #41 OR #42 OR #43 OR #44
- #48 #45 AND #46 AND #47

**EconLit via EBSCO****Concept 1**

- S1 TI patient\* OR AB patient\*
- S2 TI family OR AB family
- S3 TI families OR families
- S4 TI carer\* OR AB carer\*
- S5 TI caregiver\* OR AB caregiver\*
- S6 TI survivor\* OR AB survivor\*

**Concept 2**

- S7 TI ((head OR neck OR mouth OR pharynx OR "oral cavity" OR "oral cavities" OR "accessory sinuses" OR "accessory sinus" OR "nasal cavity" OR "nasal cavities" OR "middle ear" OR larynx) N4 (cancer\* OR tumo#r OR neoplasm\*)) OR AB ((head OR neck OR mouth OR pharynx OR "oral cavity" OR "oral cavities" OR "accessory sinuses" OR "accessory sinus" OR "nasal cavity" OR "nasal cavities" OR "middle ear" OR larynx) N4 (cancer\* OR tumo#r OR neoplasm\*))

**Concept 3**

- S8 TI "financial toxicity" OR AB "financial toxicity"
- S9 TI "financial toxicities" OR AB "financial toxicities"
- S10 TI "financial worry" OR AB "financial worry"
- S11 TI "financial worries" OR AB "financial worries"
- S12 TI "financial burden" OR AB "financial burden"
- S13 TI "financial burdens" OR AB "financial burdens"
- S14 TI "financial hardship\*" OR AB "financial hardship\*"
- S15 TI "financial distress\*" OR AB "financial distress\*"



- S16 TI "material hardship\*" OR AB "material hardship\*"
- S17 TI "out of pocket" OR AB "out of pocket"
- S18 TI bankrupt\* OR AB bankrupt\*
- S19 TI "economic burden\*" OR AB "economic burden\*"
- S20 TI "economic hardship\*" OR AB "economic hardship\*"
- S21 TI debt\* OR AB debt\*
- S22 TI cost\* OR AB cost\*
- S23 S1 OR S2 OR S3 OR S4 OR S5 OR S6
- S24 S8 OR S9 OR S10 OR S11 OR S12 OR S13 OR S14 OR S15 OR S16 OR S17 OR S18 OR  
S19 OR S20 OR S21 OR S22
- S25 S7 AND S23 AND S24
- S26 Limit to English and 01/01/2010 – 19/03/21

**EMBASE via Elsevier****Concept 1**

- S1 Patient\*:ab,ti
- S2 Family:ab,ti
- S3 Carer\*:ab,ti
- S4 Caregiver\*:ab,ti
- S5 Survivor\*:ab,ti
- S6 Patient/de
- S7 Family/de
- S8 Caregiver/de
- S9 "Cancer survivor"/de

**Concept 2**

- S10 ((head OR neck OR "nasal cavity" OR "nasal cavities" OR "oral cavity" OR "oral cavities" OR larynx OR mouth OR pharynx OR "middle ear" OR "accessory sinuses" OR "accessory sinus") NEAR/4 (cancer OR cancers OR tumor OR tumors OR tumour OR tumours OR neoplasm OR neoplasms)):ab,ti
- S11 Head/de
- S12 Neck/de
- S13 Mouth/de
- S14 Pharynx/de
- S15 "Nose Cavity"/de
- S16 Ear/de
- S17 Nose/de
- S18 Larynx/de

S19 "Head and neck tumor"/de

### Concept 3

S20 "financial burden\*":ab,ti

S21 "financial toxicit\*":ab,ti

S22 "financial hardship\*":ab,ti

S23 "financial stress\*":ab,ti

S24 "financial distress\*":ab,ti

S25 "material hardship\*":ab,ti

S26 "out of pocket":ab,ti

S27 Bankruptcy:ab,ti

S28 Debt\*:ab,ti

S29 "economic burden":ab,ti

S30 "economic hardship\*":ab,ti

S31 cost\*:ab,ti

S32 "Financial stress"/de

S33 "Financial management"/de

S34 Cost/de

S35 Economics/de

S36 #1 OR #2 OR #3 OR #4 OR #5 OR #6 OR #7 OR #8 OR #9

S37 #10 OR #11 OR #12 OR #13 OR #14 OR #15 OR #16 OR #17 OR #18 OR #19

S38 #20 OR #21 OR #22 OR #23 OR #24 OR #25 OR #26 OR #27 OR #28 OR #29 OR #30

OR #31 OR #32 OR #33 OR #34 OR #35

S39 #36 AND #37 AND #38

S40 #39 AND [2010-2021]/py AND English: la

**MEDLINE Complete via EBSCO****Concept 1**

S1 AB (Patient\* OR "family members" OR family OR families OR carer\* OR caregiver\* OR survivor\*) OR TI (Patient\* OR "family members" OR family OR families OR carer\* OR caregiver\* OR survivor\*)

S2 (MH "patients") OR (MH "family") OR (MH "cancer survivors") OR (MH "caregivers")

**Concept 2**

S3 AB (Head OR Neck" OR "oral cavity" OR pharynx OR "nasal cavities" OR "nasal cavity" OR "middle ear" OR "accessory sinuses" OR larynx OR mouth) OR TI (Head OR Neck" OR "oral cavity" OR pharynx OR "nasal cavities" OR "nasal cavity" OR "middle ear" OR "accessory sinuses" OR larynx OR mouth)

S4 (MH "Head and neck neoplasms") OR (MH "Head") OR (MH "Neck") OR (MH "Mouth") OR (MH "Pharynx") OR MH (Nasal Cavity") OR (MH "Ear") OR (MH "Nose") OR (MH "Larynx")

**Concept 3**

S5 AB ("Financial burden" OR "financial burdens" OR "financial toxicity" OR "financial toxicities" OR "financial hardship" OR "financial hardships" OR "financial stress" OR "financial stresses" OR "financial distress" OR "financial distresses" OR "material hardship" OR "material hardships" OR "out of pocket" OR bankruptcy OR debt OR debts OR "economic burden" OR "economics burdens" OR "economic hardship" or "economic hardships" OR cost\*) OR TI ("Financial burden" OR "financial burdens" OR "financial toxicity" OR "financial toxicities" OR "financial hardship" OR "financial hardships" OR "financial stress" OR "financial stresses" OR "financial distress" OR "financial distresses" OR "material hardship" OR "material hardships" OR "out of pocket" OR bankruptcy OR debt OR debts OR "economic

burden" OR "economics burdens" OR "economic hardship" or "economic hardships" OR cost\*)

S6 (MH "Financial stress") OR (MH "Bankruptcy") OR (MH "Costs and cost analysis") OR (MH "economics")

S7 S1 OR S2

S8 S3 OR S4

S9 S5 OR S6

S10 S7 AND S8 AND S9

S11 S10 limited to English and 01/01/2010 – 19/03/21
